# Supplementary material for: Control mechanism behind broad fluorescence from violet to orange in ZnO quantum dots
Source: Royal Society of Chemistry journal article supplement (doi:10.1039/c2ce26550h), 2012-11-13

## Supporting Information

**Fig. S1** TEM images of S1-S4. The insets show the size distributions.

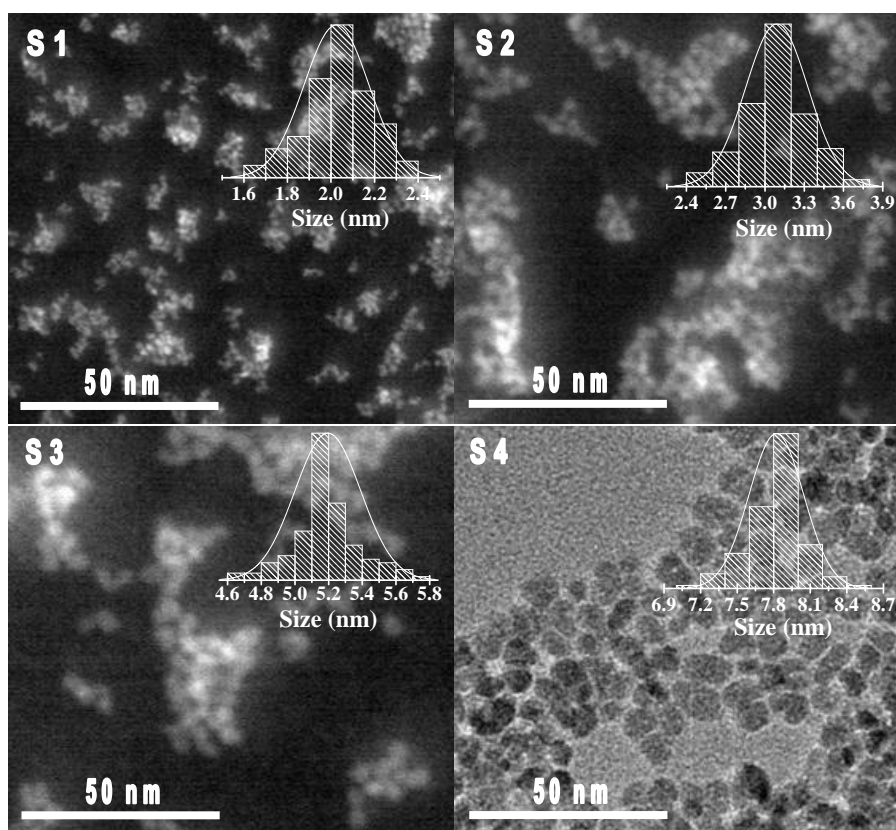

**Fig. S2** The more detailed evolutions of PL and PLE spectra with increasing QDs size.

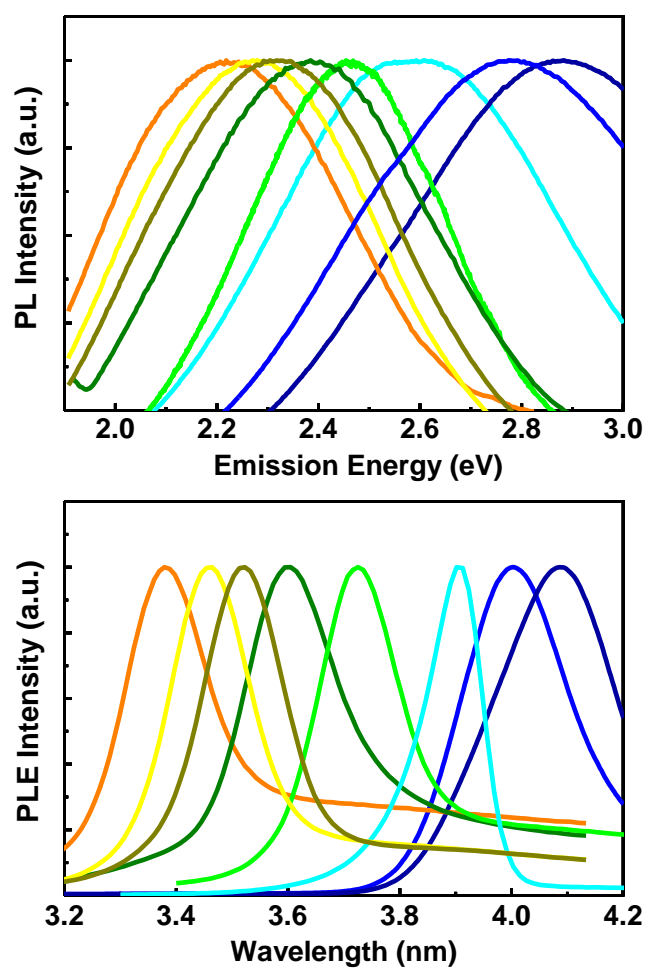

**Fig. S3** Comprehensive fluorescence photographs illustrating two mechanisms including the excitation and the quantum size regulations behind tunable fluorescence of ZnO QDs.

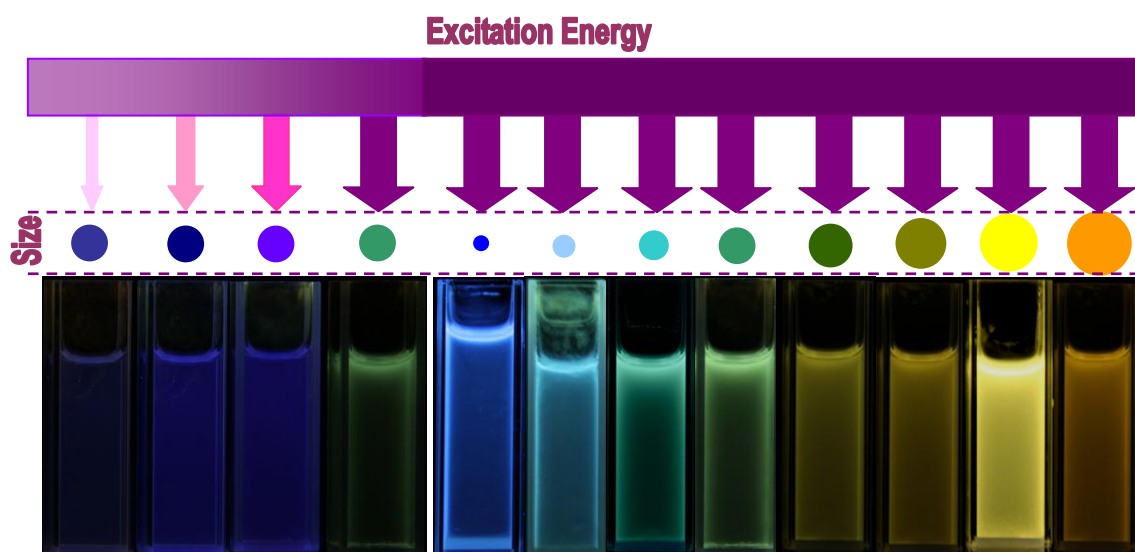

Supplement: c2ce26550h.pdf [file c2ce26550h.pdf]
